# Supplementary material
Source: publisher site journal article supplement (https://www.dovepress.com/article/323736)
Supplement: Supplementary file 1 [file get_supplementary_file.php]

## Content

|                                                               |   |
|---------------------------------------------------------------|---|
| Text S1: Detailed search string in Embase.....                | 2 |
| Text S2: Detailed search string in Medline and Cochrane ..... | 3 |
| Text S3: Additional search in Embase .....                    | 4 |
| Text S4: Additional search in Medline.....                    | 5 |
| Table S1: Risk of bias assessment.....                        | 6 |
| Table S2: Extracted data (with added detail) .....            | 8 |

## Text S1: Detailed search string in Embase

Database: Embase <1974 to 2021 August 31>

Search Strategy: -----

1. 1 exp chronic obstructive lung disease/ (135754)
2. 2 ("Chronic Obstructive Pulmonary Disease" or COPD or COAD or Chronic Obstructive Airway Disease or Chronic Obstructive Lung Disease or

Chronic Airflow Obstructions or Chronic Airflow Obstruction).ti,ab,kw. (119346)

3. 3 1 or 2 (161837)
4. 4 exp diet therapy/ (349044)
5. 5 exp nutrition/ (2200000)
6. 6 exp food/ (1031087)
7. 7 exp diet/ (326727)
8. 8 (Diet or Nutrition\* or Food or Vegetable\* or Fruit\* or Nut or Nuts or Protein\* or Amino Acid\* or Fatty acid\* or Micronutrient\* or

Phytochem\* or Vitamin\* or Minerals\* or Antioxidant\* or Carbohydrate\*).ti,ab,kw. (5510940)

9. 9 4or5or6or7or8(6630190)
10. 10 ((respirator\* or lung) and (inflammation or immune)).ti,ab,kw. (138796)
11. 11 respiratory function.ti,ab,kw. (16960)
12. 12 improved lung function.ti,ab,kw. (1328)
13. 13 exacerbat\*.ti,ab,kw. (166442)
14. 14 10 or 11 or 12 or 13 (312766)
15. 15 3 and 9 and 14 (6134)
16. 16 limit 15 to "therapy (best balance of sensitivity and specificity)" (667)
17. 17 limit 15 to "therapy (maximizes sensitivity)" (1303)
18. 18 limit 15 to "therapy (maximizes specificity)" (240)

\*\*\*\*\*

## Text S2: Detailed search string in Medline and Cochrane

Database: Ovid MEDLINE(R) and Epub Ahead of Print, In-Process & Other Non-Indexed Citations and Daily <1946 to August 31, 2021> Search Strategy:

- 
1. 1 exacerbat\*.ti,ab,kw. (108473)
  2. 2 improved lung function.ti,ab,kw. (693)
  3. 3 respiratory function.ti,ab,kw. (11617)
  4. 4 ((respirator\* or lung) and (inflammation or immune)).ti,ab,kw. (84787)
  5. 5 1or2or3or4(199873)
  6. 6 (Chronic Obstructive Pulmonary Disease or COPD or COAD or Chronic Obstructive Airway Disease or Chronic Obstructive Lung Disease or Chronic Airflow Obstructions or Chronic Airflow Obstruction).ti,ab,kw. (67677)
  7. 7 exp Pulmonary Disease, Chronic Obstructive/ (56161)
  8. 8 6 or 7 (88195)
  9. 9 (Diet or Nutrition\* or Food or Vegetable\* or Fruit\* or Nut or Nuts or Protein\* or Amino Acid\* or Fatty acid\* or Micronutrient\* or Phytochem\* or Vitamin\* or Minerals\* or Antioxidant\* or Carbohydrate\*).ti,ab,kw. (4585273)
  10. 10 exp Diet Therapy/ (54812)
  11. 11 Nutrition Therapy/ (2427)
  12. 12 exp "Diet, Food, and Nutrition"/ (1719790)
  13. 13 9 or 10 or 11 or 12 (5500225)
  14. 14 5 and 8 and 13 (3052)
  15. 15 limit 14 to "therapy (best balance of sensitivity and specificity)" (216)
  16. 16 limit 14 to "therapy (maximizes specificity)" (123)
  17. 17 limit 14 to "therapy (maximizes sensitivity)" (1220)

\*\*\*\*\*

## Text S3: Additional search in Embase

Database: Embase <1974 to 2021 August 26>

Search Strategy:

- 
- 1 exp chronic obstructive lung disease/ (146587)
  - 2 ("Chronic Obstructive Pulmonary Disease" or COPD or COAD or Chronic Obstructive Airway Disease or Chronic Obstructive Lung Disease or Chronic Airflow Obstructions or Chronic Airflow Obstruction).ti,ab,kw. (127578)
  - 3 1 or 2 (173884)
  - 4 exp diet therapy/ (367315)
  - 5 exp nutrition/ (2327179)
  - 6 exp food/ (1091213)
  - 7 exp diet/ (348654)
  - 8 (Diet or Nutrition\* or Food or Vegetable\* or Fruit\* or Nut or Nuts or Protein\* or Amino Acid\* or Fatty acid\* or Micronutrient\* or Phytochem\* or Vitamin\* or Minerals\* or Antioxidant\* or Carbohydrate\*).ti,ab,kw. (5791505)
  - 9 (fiber or probiotic\* or omega).ti,ab,kw. (275021)
  - 10 4 or 5 or 6 or 7 or 8 (6967921)
  - 11 ((respirator\* or lung) and (inflammation or immune)).ti,ab,kw. (155498)
  - 12 respiratory function.ti,ab,kw. (17904)
  - 13 improved lung function.ti,ab,kw. (1433)
  - 14 exacerbat\*.ti,ab,kw. (180737)
  - 15 11 or 12 or 13 or 14 (343733)
  - 16 3 and 10 and 15 (6649)
  - 17 limit 16 to "therapy (best balance of sensitivity and specificity)" (724)
  - 18 limit 16 to "therapy (maximizes sensitivity)" (1435)
  - 19 limit 16 to "therapy (maximizes specificity)" (259)
  - 20 4 or 5 or 6 or 7 or 8 or 9 (7131632)
  - 21 3 and 15 and 20 (6700)
  - 22 21 not 16 (51)
  - 23 limit 22 to "therapy (maximizes sensitivity)" (8)

\*\*\*\*\*

## Text S4: Additional search in Medline

Database: Ovid MEDLINE(R) and Epub Ahead of Print, In-Process, In-Data-Review & Other Non-Indexed Citations and Daily <1946 to August 25, 2021>  
Search Strategy:

- 
- 1 exacerbat\*.ti,ab,kw. (118796)
  - 2 improved lung function.ti,ab,kw. (749)
  - 3 respiratory function.ti,ab,kw. (12275)
  - 4 ((respirator\* or lung) and (inflammation or immune)).ti,ab,kw. (96883)
  - 5 1 or 2 or 3 or 4 (222291)
  - 6 (Chronic Obstructive Pulmonary Disease or COPD or COAD or Chronic Obstructive Airway Disease or Chronic Obstructive Lung Disease or Chronic Airflow Obstructions or Chronic Airflow Obstruction).ti,ab,kw. (73007)
  - 7 exp Pulmonary Disease, Chronic Obstructive/ (60078)
  - 8 6 or 7 (94015)
  - 9 (fiber or probiotic\* or omega).ti,ab,kw. (242082)
  - 10 (Diet or Nutrition\* or Food or Vegetable\* or Fruit\* or Nut or Nuts or Protein\* or Amino Acid\* or Fatty acid\* or Micronutrient\* or Phytochem\* or Vitamin\* or Minerals\* or Antioxidant\* or Carbohydrate\*).ti,ab,kw. (4832573)
  - 11 exp Diet Therapy/ (57754)
  - 12 Nutrition Therapy/ (2768)
  - 13 exp "Diet, Food, and Nutrition"/ (1805333)
  - 14 10 or 11 or 12 or 13 (5780591)
  - 15 5 and 8 and 14 (3367)
  - 16 limit 15 to "therapy (best balance of sensitivity and specificity)" (244)
  - 17 limit 15 to "therapy (maximizes specificity)" (142)
  - 18 limit 15 to "therapy (maximizes sensitivity)" (1347)
  - 19 9 or 10 or 11 or 12 or 13 (5930008)
  - 20 5 and 8 and 19 (3401)
  - 21 limit 20 to "therapy (maximizes sensitivity)" (1358)
  - 22 21 not 18 (11)

\*\*\*\*\*

Table S1: Risk of bias assessment

| Study                                                                                                                                                                                                                                                                                           | Random sequence generation | Allocation concealment | Selective reporting | Other bias | Blinding of participants and personnel | Blinding of outcome assessment | Incomplete outcome data | Quality |
|-------------------------------------------------------------------------------------------------------------------------------------------------------------------------------------------------------------------------------------------------------------------------------------------------|----------------------------|------------------------|---------------------|------------|----------------------------------------|--------------------------------|-------------------------|---------|
| Ahnfeldt-Mollerup, P., et al. (2015). "The effect of protein supplementation on quality of life, physical function, and muscle strength in patients with chronic obstructive pulmonary disease." <i>European journal of physical and rehabilitation medicine</i> 51(4): 447-456 <sup>19</sup> . | Low                        | Low                    | Unclear             | Low        | High                                   | High                           | Low                     | Poor    |
| Al-Azzawi, M. A., et al. (2020). "Therapeutic effects of black seed oil supplementation on chronic obstructive pulmonary disease patients: A randomized controlled double blind clinical trial." <i>Heliyon</i> 6(8): e04711 <sup>25</sup> .                                                    | Unclear                    | Unclear                | Low                 | High       | High                                   | Unclear                        | Low                     | Poor    |
| Baldrick, F. R., et al. (2012). "Effect of fruit and vegetable intake on oxidative stress and inflammation in COPD: a randomised controlled trial." <i>The european respiratory journal</i> 39(6): 1377-1384 <sup>23</sup> .                                                                    | Low                        | Low                    | Unclear             | Low        | Low                                    | Low                            | Low                     | Fair    |
| Behnia M, Wheatley CM, Avolio A, Johnson BD. Influence of dietary nitrate supplementation on lung function and exercise gas exchange in COPD patients. <i>Nitric Oxide</i> . 2018 jun 1;76:53-61 <sup>21</sup> .                                                                                | Unclear                    | Unclear                | Low                 | Low        | Low                                    | Unclear                        | Low                     | Poor    |
| Constantin D, Menon MK, Houchen-Wolloff L, Morgan MD, Singh SJ, Greenhaff P, Steiner MC: Skeletal muscle molecular responses to resistance training and dietary supplementation in COPD. <i>Thorax</i> 2013, 68(7):625-633 <sup>29</sup> .                                                      | Low                        | Low                    | Low                 | Low        | Low                                    | Unclear                        | Low                     | Fair    |
| Keranis E, Makris D, Rodopoulou P, et al. Impact of dietary shift to higher-antioxidant foods in COPD: a randomised trial. <i>Eur Respir J</i> . 2010;36(4):774-780 <sup>24</sup> .                                                                                                             | Low                        | Low                    | Low                 | low        | High                                   | Low                            | Low                     | Fair    |
| Kerley CP, James PE, McGowan A, Faul J, Cormican L: Dietary nitrate improved exercise capacity in COPD but not blood pressure or pulmonary function: a 2 week, double-blind randomised, placebo-controlled crossover trial. <i>Int J Food Sci Nutr</i> 2019, 70(2):222-231 <sup>20</sup> .      | Low                        | Low                    | Low                 | Low        | Low                                    | Low                            | Low                     | Good    |
| Knowles JB, Fairbairn MS, Wiggs BJ, Chan-Yan C, Pardy RL. Dietary supplementation and respiratory muscle performance in patients with COPD. <i>Chest</i> .1988, 93(5):977-983 <sup>30</sup> .                                                                                                   | Low                        | Low                    | Low                 | Low        | Low                                    | Low                            | Low                     | Good    |
| Muhamad, R., et al. (2018). "The effect of Tualang honey on the quality of life of patients with chronic obstructive pulmonary disease: a randomized controlled trial." <i>Journal of</i>                                                                                                       | Low                        | Low                    | Unclear             | Low        | Unclear                                | Unclear                        | Low                     | Fair    |

Supplementary material for *Effects of nutritional interventions in individuals with chronic obstructive lung disease: A systematic review of randomized controlled trials*

|                                                                                                                                                                                                                                                                                                                     |         |         |         |     |      |         |      |      |
|---------------------------------------------------------------------------------------------------------------------------------------------------------------------------------------------------------------------------------------------------------------------------------------------------------------------|---------|---------|---------|-----|------|---------|------|------|
| taibah university medical sciences <b>13</b> (1): 42-50 <sup>26</sup> .                                                                                                                                                                                                                                             |         |         |         |     |      |         |      |      |
| Steiner MC, Barton RL, Singh SJ, Morgan MD. <b>Nutritional enhancement of exercise performance in chronic obstructive pulmonary disease: a randomised controlled trial.</b> <i>Thorax</i> 2003, <b>58</b> (9):745-751 <sup>31</sup> .                                                                               | Low     | Low     | Low     | Low | Low  | Low     | High | Fair |
| Sugawara K, Takahashi H, Kashiwagura T, Yamada K, Yanagida S, Homma M, Dairiki K, Sasaki H, Kawagoshi A, Satake M <i>et al</i> : <b>Effect of anti-inflammatory supplementation with whey peptide and exercise therapy in patients with COPD.</b> <i>Respir Med</i> 2012, <b>106</b> (11):1526-1534 <sup>28</sup> . | Unclear | Low     | Low     | Low | High | Unclear | Low  | Poor |
| Panahi, Y., et al. (2012). "Impact of Adjunctive Therapy with <i>Chlorellav ulgaris</i> Extract on Antioxidant Status, Pulmonary Function, and Clinical Symptoms of Patients with Obstructive Pulmonary Diseases." <i>Scientia Pharmaceutica</i> <b>80</b> (3): 719-730 <sup>27</sup> .                             | Unclear | Unclear | Unclear | Low | High | Unclear | Low  | Poor |
| Pavitt, M. J., et al. (2020). "Oral nitrate supplementation to enhance pulmonary rehabilitation in COPD: ON-EPIC a multicentre, double-blind, placebo-controlled, randomised parallel group study." <i>Thorax</i> . 2020 Jul;75(7):547-555 <sup>22</sup> .                                                          | Low     | Low     | Low     | Low | Low  | Low     | Low  | Good |

Table S2: Extracted data (with added detail)

| Study                                                                                                                                                                                                                 | Design                                                            | Population                                                                       | Intervention                                                                                                                                                                                                                                                                                                                                                                                  | Outcome measures                                                                              | Results                                                                                                                                             |
|-----------------------------------------------------------------------------------------------------------------------------------------------------------------------------------------------------------------------|-------------------------------------------------------------------|----------------------------------------------------------------------------------|-----------------------------------------------------------------------------------------------------------------------------------------------------------------------------------------------------------------------------------------------------------------------------------------------------------------------------------------------------------------------------------------------|-----------------------------------------------------------------------------------------------|-----------------------------------------------------------------------------------------------------------------------------------------------------|
| Ahnfeldt-Mollerup, P. et al., 2015:<br><i>The effect of protein supplementation on quality of life, physical function, and muscle strength in patients with chronic obstructive pulmonary disease</i> <sup>19</sup> . | Prospective, parallel group randomized clinical trial             | 53 participants with stable moderate to severe COPD at outpatient rehabilitation | <p><i>I</i> (n=28/18): Two protein bars daily, each containing 135 kcal, 9.3 g protein, 14.6 g carbohydrate and 4.2 g fat. Also added linseed oil and tocopherol.</p> <p><i>C</i> (n=25/17): no placebo</p> <p><i>Both</i>: 2x/week physiotherapist supervised exercise classes, 1x/week unsupervised at-home training.</p> <p><i>Duration</i>: 9 weeks. Follow-up at 9, 21 and 35 weeks.</p> | <b>Physical function:</b> Shuttle walk time (s), mean treatment effect (95% CI)               | <i>End-of-intervention:</i> -2.3 (-40, 44), p=ns                                                                                                    |
|                                                                                                                                                                                                                       |                                                                   |                                                                                  |                                                                                                                                                                                                                                                                                                                                                                                               | <b>Physical function:</b> Maximal muscle strength test (N/kg), mean treatment effect (95% CI) | <i>End-of-intervention:</i> -0.05 (-0.57, 0.35), p=ns<br><i>End-of-follow-up:</i> -0.09 (-0.45, 0.63), p=ns                                         |
|                                                                                                                                                                                                                       |                                                                   |                                                                                  |                                                                                                                                                                                                                                                                                                                                                                                               | <b>Perceived health:</b> SGRQ score, mean treatment effect (95% CI)                           | <i>End-of-intervention:</i> -2.3 (-12, 7), p=ns<br><i>End-of-follow-up:</i> -1.2 (-9, 11), p=ns                                                     |
|                                                                                                                                                                                                                       |                                                                   |                                                                                  |                                                                                                                                                                                                                                                                                                                                                                                               | <b>Inflammatory marker:</b> C-reactive protein (mg/l), mean treatment effect (95% CI)         | <i>End-of-intervention:</i> 3.9 (-1.3, 9.2), p=ns                                                                                                   |
|                                                                                                                                                                                                                       |                                                                   |                                                                                  |                                                                                                                                                                                                                                                                                                                                                                                               | <b>Inflammatory marker:</b> Leucocytes (10 <sup>9</sup> /L), mean treatment effect (95% CI)   | <i>End-of-intervention:</i> -0.5 (-1.8, 0.9), p=ns                                                                                                  |
|                                                                                                                                                                                                                       |                                                                   |                                                                                  |                                                                                                                                                                                                                                                                                                                                                                                               | <b>SUMMARY</b>                                                                                | No significant differences between groups on all outcome measures at end-of-intervention and 6-month follow-up.                                     |
| Al-Azzawi, M. A. <i>Et al.</i> , 2020:<br><i>Therapeutic effects of black seed oil supplementation on chronic obstructive pulmonary disease patients: A</i>                                                           | Prospective, randomized controlled double-blinded clinical trial. | 100 participants with mild to moderate COPD at outpatient setting.               | <p><i>I</i> (n=50/47): 2x/day capsules containing 1 g cold-pressed black seed oil</p> <p><i>C</i> (n=50/44): no placebo</p>                                                                                                                                                                                                                                                                   | <b>Lung function:</b> FEV1 (% of predicted), pre-post mean ± SD.                              | <i>I</i> : 74±9.0 – 82±6.9 (p<0.001)<br><i>C</i> : 73±8.4 - 76±7.8 (p=0.06)<br>Significant improvement for <i>I</i> compared to <i>C</i> , p<0.001. |
|                                                                                                                                                                                                                       |                                                                   |                                                                                  |                                                                                                                                                                                                                                                                                                                                                                                               | <b>Lung function:</b> FVC (% of predicted), pre-post mean ± SD                                | <i>I</i> : 83±8.2 – 91±8.0 (p<0.001)<br><i>C</i> : 83±8.4 – 85±9.1 (p=0.14)<br>Significant improvement for <i>I</i> compared to <i>C</i> , p=0.002  |

Supplementary material for *Effects of nutritional interventions in individuals with chronic obstructive lung disease: A systematic review of randomized controlled trials*

|                                                                        |  |  |                           |                                                                                                                                      |                                                                                                                                                                                                                       |
|------------------------------------------------------------------------|--|--|---------------------------|--------------------------------------------------------------------------------------------------------------------------------------|-----------------------------------------------------------------------------------------------------------------------------------------------------------------------------------------------------------------------|
| <p>randomized controlled double blind clinical trial<sup>25</sup>.</p> |  |  | <p>Duration: 3 months</p> | <p><b>Lung function:</b><br/>FEV1/FVC (% of predicted), pre-post mean <math>\pm</math> SD</p>                                        | <p>I: 67<math>\pm</math>0.70 – 75<math>\pm</math>0.64 (p=0.012)<br/>C: 69<math>\pm</math>7.2 – 71<math>\pm</math>7.6 (p=0.08)<br/>Significant improvement for I compared to C, p=0.001.</p>                           |
|                                                                        |  |  |                           | <p><b>Lung function:</b> PEF (% of predicted), pre-post mean <math>\pm</math> SD</p>                                                 | <p>I: 55<math>\pm</math>6.4 – 65<math>\pm</math>5.3 (p&lt;0.001)<br/>C: 53<math>\pm</math>4.7 – 56<math>\pm</math>6.6 (p=0.14)<br/>Significant improvement for I compared to C, p&lt;0.001.</p>                       |
|                                                                        |  |  |                           | <p><b>Lung function:</b> FEF<sub>25-75</sub> (% of predicted), pre-post mean <math>\pm</math> SD</p>                                 | <p>I: 29<math>\pm</math>3.2 – 35<math>\pm</math>5.2 (p&lt;0.001)<br/>C: 28<math>\pm</math>3.3 – 29<math>\pm</math>3.5 (p=0.07)<br/>Significant increase for I compared to C, p&lt;0.001</p>                           |
|                                                                        |  |  |                           | <p><b>Inflammatory marker:</b><br/>Plasma TNF-<math>\alpha</math> (pg/ml), pre-post mean <math>\pm</math> SD.</p>                    | <p>I: 33<math>\pm</math>3.0 – 22<math>\pm</math>5.1 (p&lt;0.001)<br/>C: 34<math>\pm</math>2.5 – 26<math>\pm</math>5.0 (p&lt;0.001)<br/>Significant decrease for I compared to C, p&lt;0.001</p>                       |
|                                                                        |  |  |                           | <p><b>Inflammatory marker:</b><br/>Plasma IL-6, pre-post mean <math>\pm</math> SD.</p>                                               | <p>I: 4.1<math>\pm</math>0.5 - 2.5<math>\pm</math>0.6 (p&lt;0.001)<br/>C: 4.0<math>\pm</math>0.5 - 3.1<math>\pm</math>0.6 (p&lt;0.001)<br/>Both groups decreased, I more than C. Between-group p-value not given.</p> |
|                                                                        |  |  |                           | <p><b>Oxidative stress marker:</b><br/>Thiobarbituric acid reactive substances (nmol MDA/ml), pre-post mean <math>\pm</math> S D</p> | <p>I: 7.2<math>\pm</math>1.2 - 3.8<math>\pm</math>0.7<br/>C: 6.7<math>\pm</math>1.3 - 6.2<math>\pm</math>1.3<br/>Significant decrease for I compared to C, p&lt;0.001</p>                                             |
|                                                                        |  |  |                           | <p><b>Oxidative stress marker:</b><br/>Protein carbonyl content (nmol/mg protein), pre-post mean <math>\pm</math> SD.</p>            | <p>I: 3.0<math>\pm</math>0.56 - 2.0<math>\pm</math>0.52<br/>C: 2.9<math>\pm</math>0.46 - 2.7<math>\pm</math>0.48<br/>Significant decrease for I compared to C, p&lt;0.001</p>                                         |
|                                                                        |  |  |                           | <p><b>Antioxidant marker:</b><br/>Catalase (nmol/min/ml), pre-post mean <math>\pm</math> SD.</p>                                     | <p>I: 58<math>\pm</math>3.5 – 78<math>\pm</math>7.0<br/>C: 61<math>\pm</math>5.7 – 63<math>\pm</math>4.6<br/>Significant decrease for I compared to C, p&lt;0.001</p>                                                 |

Supplementary material for *Effects of nutritional interventions in individuals with chronic obstructive lung disease: A systematic review of randomized controlled trials*

|                                                                                                                                                                          |                                        |                                                                                                                                                                                                                      |                                                                                                                                                                                                                                                                                        |                                                                                                                                                                                                                                                                                            |  |
|--------------------------------------------------------------------------------------------------------------------------------------------------------------------------|----------------------------------------|----------------------------------------------------------------------------------------------------------------------------------------------------------------------------------------------------------------------|----------------------------------------------------------------------------------------------------------------------------------------------------------------------------------------------------------------------------------------------------------------------------------------|--------------------------------------------------------------------------------------------------------------------------------------------------------------------------------------------------------------------------------------------------------------------------------------------|--|
|                                                                                                                                                                          |                                        |                                                                                                                                                                                                                      |                                                                                                                                                                                                                                                                                        | <p><b>Antioxidant marker:</b><br/>Glutathione peroxidase (nmol/min/ml), pre-post mean <math>\pm</math> SD.<br/>I: 51<math>\pm</math>2.2 – 69<math>\pm</math>2.7<br/>C: 53<math>\pm</math>1.3 – 55<math>\pm</math>2.6<br/>Significant increase only for I, <math>p &lt; 0.001</math>.</p>   |  |
|                                                                                                                                                                          |                                        |                                                                                                                                                                                                                      |                                                                                                                                                                                                                                                                                        | <p><b>Antioxidant marker:</b><br/>Superoxide dismutase (U/ml), pre-post mean <math>\pm</math> SD.<br/>I: 3.0<math>\pm</math>0.81 - 4.0<math>\pm</math>1.2<br/>C: 2.9<math>\pm</math>0.86 - 3.3<math>\pm</math>1.2<br/>Significant increase in I compared to C, <math>p = 0.001</math>.</p> |  |
|                                                                                                                                                                          |                                        |                                                                                                                                                                                                                      |                                                                                                                                                                                                                                                                                        | <p><b>Antioxidant marker:</b><br/>Reduced glutathione (mg/dl), pre-post mean <math>\pm</math> SD.<br/>I: 14<math>\pm</math>4.5 – 20<math>\pm</math>7.3<br/>C: 14<math>\pm</math>4.1 – 16<math>\pm</math>4.4<br/>Significant increase in I compared to C, <math>p = 0.001</math>.</p>       |  |
|                                                                                                                                                                          |                                        |                                                                                                                                                                                                                      |                                                                                                                                                                                                                                                                                        | <p><b>Antioxidant marker:</b><br/>Vitamin C (mg/dl), pre-post mean <math>\pm</math> SD.<br/>I: 0.36<math>\pm</math>0.02 - 0.60<math>\pm</math>0.02<br/>C: 0.35<math>\pm</math>0.02 - 0.37<math>\pm</math>0.02<br/>Significant increase in I compared to C, <math>p &lt; 0.001</math>.</p>  |  |
|                                                                                                                                                                          |                                        |                                                                                                                                                                                                                      |                                                                                                                                                                                                                                                                                        | <p><b>Antioxidant marker:</b><br/>Vitamin E (mg/dl), pre-post mean <math>\pm</math> SD.<br/>I: 0.54<math>\pm</math>0.02 - 0.88<math>\pm</math>0.02<br/>C: 0.57<math>\pm</math>0.02 - 0.59<math>\pm</math>0.02<br/>Levels elevated significantly only for I, <math>p &lt; 0.001</math>.</p> |  |
|                                                                                                                                                                          |                                        |                                                                                                                                                                                                                      |                                                                                                                                                                                                                                                                                        | <p><b>SUMMARY</b><br/>Significant differences favoring intervention over control on all outcome measures.</p>                                                                                                                                                                              |  |
| Baldrick, F. R. et al., 2012:<br><i>Effect of fruit and vegetable intake on oxidative stress and inflammation in COPD: a randomised controlled trial</i> <sup>23</sup> . | Open-label randomized controlled trial | 81 participants with stable moderate to severe COPD and habitually low fruit and vegetable intake ( $\leq 2$ portions*) at outpatient setting.<br><br>* 80-g serving of fruit or vegetable, or 150 mL of fruit juice | I (n=40/38): $\geq 5$ portions of fruits and vegetables daily.<br><br>C (41/37): $\leq 2$ portions of fruits and vegetables daily.<br><br>Both: weekly self-selected deliveries of fruits and vegetables. Advise on storage and cooking methods. Weekly contact by study researcher to | <p><b>Lung function:</b> FEV1 (% of predicted), change from baseline<br/>I: +2% (<math>p = 0.552</math>)<br/>C: +3% (<math>p = 0.288</math>)<br/>No significant between-group difference, <math>p = 0.654</math></p>                                                                       |  |
|                                                                                                                                                                          |                                        |                                                                                                                                                                                                                      |                                                                                                                                                                                                                                                                                        | <p><b>Lung function:</b> FVC (% of predicted), change from baseline<br/>I: +2% (<math>p = 0.356</math>)<br/>C: +9% (<math>p = 0.032</math>)<br/>No significant between-group difference, <math>p = 0.142</math></p>                                                                        |  |
|                                                                                                                                                                          |                                        |                                                                                                                                                                                                                      |                                                                                                                                                                                                                                                                                        | <p><b>Lung function:</b> FEV1/FVC (% of predicted), change from baseline<br/>I: -2% (<math>p = 0.484</math>)<br/>C: -5% (<math>p = 0.103</math>)<br/>No significant between-group difference, <math>p = 0.306</math></p>                                                                   |  |
|                                                                                                                                                                          |                                        |                                                                                                                                                                                                                      |                                                                                                                                                                                                                                                                                        | <p><b>Inflammatory marker:</b> Sputum Interleukin-8 (ng/ml), change from baseline<br/>I: -15% (<math>p = 0.407</math>)<br/>C: -15% (<math>p = 0.538</math>)<br/>No significant between-group difference, <math>p = 0.992</math></p>                                                        |  |

Supplementary material for *Effects of nutritional interventions in individuals with chronic obstructive lung disease: A systematic review of randomized controlled trials*

|                                                                                                                                                             |                                                              |                                                                   |                                                                                                                                                                                                           |                                                                                                                                                                                                                                                                                                                                                                                                                                                                                                 |                                                                                                                                                                                                                                                                                                                                                                                                                                                                                                                                                                                                                                                                                |
|-------------------------------------------------------------------------------------------------------------------------------------------------------------|--------------------------------------------------------------|-------------------------------------------------------------------|-----------------------------------------------------------------------------------------------------------------------------------------------------------------------------------------------------------|-------------------------------------------------------------------------------------------------------------------------------------------------------------------------------------------------------------------------------------------------------------------------------------------------------------------------------------------------------------------------------------------------------------------------------------------------------------------------------------------------|--------------------------------------------------------------------------------------------------------------------------------------------------------------------------------------------------------------------------------------------------------------------------------------------------------------------------------------------------------------------------------------------------------------------------------------------------------------------------------------------------------------------------------------------------------------------------------------------------------------------------------------------------------------------------------|
|                                                                                                                                                             |                                                              |                                                                   | <p>encourage compliance.</p> <p><i>Duration:</i> 12 weeks<br/>Assessment at 6 and 12 weeks.</p>                                                                                                           | <p><b>Inflammatory marker:</b><br/>Sputum myeloperoxidase (ng/ml), change from baseline</p> <p><b>Inflammatory marker:</b><br/>Sputum neutrophil elastase (mig/ml), change from baseline</p> <p><b>Inflammatory marker:</b><br/>Plasma CRP (mg/l), change from baseline</p> <p><b>Oxidative stress marker:</b> Urine 8-isoprostane (nM/mM creatinine), change from baseline</p> <p><b>Oxidative stress marker:</b> Sputum 8-isoprostane (ng/ml), change from baseline</p> <p><b>SUMMARY</b></p> | <p>I: +14% (p=0.427)<br/>C: -1% (p=0.945)<br/>No significant between-group difference, p=0.500</p> <p>I: -21% (p=0.453)<br/>C: -41 % (p=0.348)<br/>No significant between-group difference, p=0.621</p> <p>I: +21% (p=0.219)<br/>C: -18% (p=0.309)<br/>No significant between-group difference, p=0.116</p> <p>I: -6% (p=0.353)<br/>C: -8% (p=0.104)<br/>No significant between-group difference, p=0.806</p> <p>I: +27% (p=0.302)<br/>C: -8% (p=0.743)<br/>No significant between-group difference, p=0.334</p> <p>No significant within-group or between-group findings for any outcome measures, except for an increase in FVC (%pred) for control group (+9%, p=0.032)</p> |
| Behnia, M. et al., 2018:<br><i>Influence of dietary nitrate supplementation on lung function and exercise gas exchange in COPD patients</i> <sup>21</sup> . | Randomized, parallel, placebo-controlled, single-blind trial | 25 patients with stable mild to severe COPD at outpatient clinic. | <p><i>I</i> (n=12): 1x/day 80 ml beetroot juice mixed with 180 ml blackcurrant juice.</p> <p><i>C</i> (n=13): 1x/day 80 ml water mixed with 180 ml black currant juice</p> <p><i>Duration:</i> 8 days</p> | <p><b>Lung function:</b> FVC, change from baseline (%)</p> <p><b>Lung function:</b> FEV1, change from baseline (%)</p> <p><b>Lung function:</b> FEV1 /FVC, change from baseline (%)</p>                                                                                                                                                                                                                                                                                                         | <p>I: +1 (p=ns)<br/>C: +1 (p=ns)<br/>No significant difference between groups.</p> <p>I: -1 (p=ns)<br/>C: -3 (p=ns)<br/>No significant difference between groups.</p> <p>I: 0 (p=ns)<br/>C: 0 (p=ns)</p>                                                                                                                                                                                                                                                                                                                                                                                                                                                                       |

Supplementary material for *Effects of nutritional interventions in individuals with chronic obstructive lung disease: A systematic review of randomized controlled trials*

|  |  |  |  |                                                                                                                                                                                                                                                           |
|--|--|--|--|-----------------------------------------------------------------------------------------------------------------------------------------------------------------------------------------------------------------------------------------------------------|
|  |  |  |  | <p><b>Lung function:</b> FEF<sub>25-75</sub>, change from baseline (%)</p> <p>I: -5 (p=ns)<br/>C: +15 (p=ns)<br/>No significant difference between groups.</p>                                                                                            |
|  |  |  |  | <p><b>Lung function:</b> FEF<sub>75</sub>, change from baseline (%)</p> <p>I: -5 (p=ns)<br/>C: +17 (p=ns)<br/>No significant difference between groups.</p>                                                                                               |
|  |  |  |  | <p><b>Respiratory muscle:</b> Maximal voluntary ventilation, change from baseline (%)</p> <p>I: +2 (p=ns)<br/>C: +1 (p=ns)<br/>No significant difference between groups.</p>                                                                              |
|  |  |  |  | <p><b>Resting lung diffusing capacity:</b> Single breath lung diffusing capacity (SBDLCO, ml/min/mmHg), intra-breath lung diffusing capacity (IBDLCO, ml/min/mmHg), IBDLCO/SBDLCO (%)</p> <p>No significant difference between group on any measures.</p> |
|  |  |  |  | <p><b>Exercise lung diffusing capacity:</b> IBDLCO (ml/min/mmHg), exercise IBDLCO/resting IBDLCO (%)</p> <p>No significant differences within or between groups on any measures</p>                                                                       |
|  |  |  |  | <p><b>Exercise capacity:</b> Work (W), Oxygen consumption (VO<sub>2</sub>, ml/kg/min)<br/><i>During submaximal and maximal exercise.</i></p> <p>No significant differences within or between groups on any measures</p>                                   |
|  |  |  |  | <p><b>Ventilation parameters:</b> Ventilation (VE, L/min), Tidal volume (TV, L), Breathing frequency</p> <p>No significant differences within or between groups on any measures.</p>                                                                      |

Supplementary material for *Effects of nutritional interventions in individuals with chronic obstructive lung disease: A systematic review of randomized controlled trials*

|  |  |  |  |                                                                                                                                                                                                                                                                     |                                                                                                                                                                                                                                               |
|--|--|--|--|---------------------------------------------------------------------------------------------------------------------------------------------------------------------------------------------------------------------------------------------------------------------|-----------------------------------------------------------------------------------------------------------------------------------------------------------------------------------------------------------------------------------------------|
|  |  |  |  | (bpm), Inspiratory capacity (IC, L), VY/IC, VE/IC, VE/breathing capacity (%)<br><i>During submaximal and maximal exercise.</i>                                                                                                                                      |                                                                                                                                                                                                                                               |
|  |  |  |  | <b>Gas exchange parameters:</b> VE/VO <sub>2</sub> ratio, P <sub>et</sub> CO <sub>2</sub> (mmHg), PECO <sub>2</sub> (mmHg), PECO <sub>2</sub> /PetCO <sub>2</sub> ratio, estimate of vascular capacitance (GXCap)<br><i>During submaximal and maximal exercise.</i> | No significant differences within or between groups on any measures.                                                                                                                                                                          |
|  |  |  |  | <b>Perceived health:</b> SGRQ, change (%)                                                                                                                                                                                                                           | I: -17 (p<0.05)<br>C: -4.2 (p=ns)<br>No significant difference between groups.                                                                                                                                                                |
|  |  |  |  | <b>Dyspnea:</b> Borg RPE during submaximal exercise, change (%)                                                                                                                                                                                                     | I: 0 (p=ns)<br>C: 0 (p=ns)                                                                                                                                                                                                                    |
|  |  |  |  | <b>Dyspnea:</b> Borg RPE during maximal exercise, change (%)                                                                                                                                                                                                        | I: 0 (p=ns)<br>C: 0 (p=ns)                                                                                                                                                                                                                    |
|  |  |  |  | <b>Dyspnea:</b> Dyspnea during submaximal exercise, change (%)                                                                                                                                                                                                      | I: 0 (p=ns)<br>C: 0 (p=ns)                                                                                                                                                                                                                    |
|  |  |  |  | <b>Dyspnea:</b> Dyspnea during maximal exercise, change (%)                                                                                                                                                                                                         | I: 0 (p=ns)<br>C: 0 (p=ns)                                                                                                                                                                                                                    |
|  |  |  |  | <b>SUMMARY</b>                                                                                                                                                                                                                                                      | Significantly decreased perceived impairment in health (SGQR) in the intervention group at end-of-intervention. Difference between the groups not significant. No significant changes within or between groups on any other outcome measures. |

Supplementary material for *Effects of nutritional interventions in individuals with chronic obstructive lung disease: A systematic review of randomized controlled trials*

|                                                                                                                                                       |                                                              |                                                                                                  |                                                                                                                                                                                                                                                                                                                                                                            |                                                                                                                                                                                                                                                                                            |
|-------------------------------------------------------------------------------------------------------------------------------------------------------|--------------------------------------------------------------|--------------------------------------------------------------------------------------------------|----------------------------------------------------------------------------------------------------------------------------------------------------------------------------------------------------------------------------------------------------------------------------------------------------------------------------------------------------------------------------|--------------------------------------------------------------------------------------------------------------------------------------------------------------------------------------------------------------------------------------------------------------------------------------------|
| Constantin, D. et al., 2013:<br><i>Skeletal muscle molecular responses to resistance training and dietary supplementation in COPD</i> <sup>29</sup> . | Randomized, parallel, placebo-controlled, double-blind trial | 59 patients with stable, severe to very severe COPD                                              | <p><i>I</i> (n=32/25): 3/week nutrition drink (containing 19 g protein and 49 g glucose polymer carbohydrate in 500 ml of water) immediately after training session.</p> <p><i>C</i> (n=27/25): noncaloric placebo drink</p> <p><i>Both</i>: 3/week supervised resistance training</p> <p><i>Duration</i>: 8 weeks. Assessment at 4 and 8 weeks.</p>                       | <p><b>Physical function:</b><br/>Quadriceps muscle function, isometric strength (change from baseline (% ± SEM)</p> <p><i>At 4 weeks:</i><br/>I: 14.6±2.8 (p&lt;0.001)<br/>C: 16.9±4.3 (p&lt;0.01)</p> <p><i>At 8 weeks:</i><br/>I: 18.0±3.4 (p&lt;0.001)<br/>C: 17.7±3.7 (p&lt;0.001)</p> |
|                                                                                                                                                       |                                                              |                                                                                                  |                                                                                                                                                                                                                                                                                                                                                                            | <p><b>Physical function</b><br/>Isokinetic work, 180 degrees/s (J)</p> <p>Improvement for both I and C. No significant difference between groups.</p>                                                                                                                                      |
|                                                                                                                                                       |                                                              |                                                                                                  |                                                                                                                                                                                                                                                                                                                                                                            | <p><b>SUMMARY</b></p> <p>Significant increase in quadriceps muscle function and isokinetic work in both groups. Between-group differences not significant.</p>                                                                                                                             |
| Keranis E. et al, 2010:<br><i>Impact of dietary shift to higher-antioxidant foods in COPD: a randomised trial</i> <sup>24</sup> .                     | Randomized controlled single-blinded trial                   | 120 participants with stable COPD from community-based outpatient clinic. Male/females n=105/15. | <p><i>Both</i>: Scheduled visits at outpatient clinics every 6 months attended by two members of the research team.</p> <p><i>I</i> (N=60): Informed on benefits of an antioxidant-rich diet with increased fruit and vegetable consumption upon outpatient clinic visits. Advised to increase their fruit/fruit juice/vegetable consumption by 1 portion/day compared</p> | <p><b>Lung function:</b> FEV1 (% of predicted).</p> <p>Annual increase for I (~ +8%), whereas C had a decline (~+15 %), p=0.03</p>                                                                                                                                                         |
|                                                                                                                                                       |                                                              |                                                                                                  |                                                                                                                                                                                                                                                                                                                                                                            | <p>Fruit and vegetable consumption, as well as consumption of other food categories, was assessed through a questionnaire</p> <p>I increased their consumption of fruits and vegetables significantly compared to C, p&lt;0.001.</p>                                                       |
|                                                                                                                                                       |                                                              |                                                                                                  |                                                                                                                                                                                                                                                                                                                                                                            | <p><b>SUMMARY</b></p> <p>Significant annual improvement in FEV1 for I, decline for C.</p>                                                                                                                                                                                                  |

Supplementary material for *Effects of nutritional interventions in individuals with chronic obstructive lung disease: A systematic review of randomized controlled trials*

|                                                                                                                                                                                                                       |                                                                                                                                                                  |                                                         |                                                                                                                                                                                               |                                                               |                                                                                                                                                |
|-----------------------------------------------------------------------------------------------------------------------------------------------------------------------------------------------------------------------|------------------------------------------------------------------------------------------------------------------------------------------------------------------|---------------------------------------------------------|-----------------------------------------------------------------------------------------------------------------------------------------------------------------------------------------------|---------------------------------------------------------------|------------------------------------------------------------------------------------------------------------------------------------------------|
|                                                                                                                                                                                                                       |                                                                                                                                                                  |                                                         | to baseline.<br><br>C (N=60): no discussion of dietary issues during visits at outpatient clinic.<br><br><i>Duration:</i> 3 years. Assessment at every 6 months.                              |                                                               |                                                                                                                                                |
| Kerley P. et al., 2019: <i>Dietary nitrate improved exercise capacity in COPD but not blood pressure or pulmonary function: a 2 week, double-blind randomised, placebo-controlled crossover trial</i> <sup>20</sup> . | Randomized, crossover, placebo-controlled, double-blind trial                                                                                                    | 10 participants with stable COPD from outpatient clinic | I (10/8): 1/day 140 ml beetroot juice<br><br>C (10/8): 1/day 140 ml nitrate depleted beetroot juice<br><br>Duration: 14 days each period. No washout. Assessment at end of each study period. | <b>Lung function:</b> FEV1 (% of predicted, mean±SD)          | <i>Baseline:</i> 57±19<br><i>I at end-point:</i> 57±21<br><i>C at end-point:</i> 55±19<br>Difference between I and C: p=0.14                   |
|                                                                                                                                                                                                                       |                                                                                                                                                                  |                                                         |                                                                                                                                                                                               | <b>Lung function:</b> FVC (% of predicted, mean±SD)           | <i>Baseline:</i> 91±12<br><i>I at end-point:</i> 102±23<br><i>C at end-point:</i> 93±16<br>Difference between I and C: p=0.14                  |
|                                                                                                                                                                                                                       |                                                                                                                                                                  |                                                         |                                                                                                                                                                                               | <b>Perceived health:</b> Clinical COPD Questionnaire          | No significant difference                                                                                                                      |
|                                                                                                                                                                                                                       |                                                                                                                                                                  |                                                         |                                                                                                                                                                                               | <b>Dyspnea:</b> Dyspnea score during ISWT                     | No significant difference                                                                                                                      |
|                                                                                                                                                                                                                       |                                                                                                                                                                  |                                                         |                                                                                                                                                                                               | <b>Physical function:</b> leg fatigue score during ISWT       | No significant difference                                                                                                                      |
|                                                                                                                                                                                                                       |                                                                                                                                                                  |                                                         |                                                                                                                                                                                               | <b>Physical function:</b> ISWT distance walked (m, mean ± SD) | <i>Baseline:</i> 384±163<br><i>I at end-point</i> Post: 440±161<br><i>C at end-point:</i> Post: 396±156<br>Difference between I and C: p<0.001 |
| <b>SUMMARY</b>                                                                                                                                                                                                        | Significant improvement on ISWT for I compared to C. No significant differences between groups on other outcome measures, including lung function parameters and |                                                         |                                                                                                                                                                                               |                                                               |                                                                                                                                                |

Supplementary material for *Effects of nutritional interventions in individuals with chronic obstructive lung disease: A systematic review of randomized controlled trials*

|                                                                                                                                  |                                             |                                                               |                                                                                                                                                                                                                                                     |                                                                                                                                                                                                                                                                               |                                                                                                                                                                                                                         |
|----------------------------------------------------------------------------------------------------------------------------------|---------------------------------------------|---------------------------------------------------------------|-----------------------------------------------------------------------------------------------------------------------------------------------------------------------------------------------------------------------------------------------------|-------------------------------------------------------------------------------------------------------------------------------------------------------------------------------------------------------------------------------------------------------------------------------|-------------------------------------------------------------------------------------------------------------------------------------------------------------------------------------------------------------------------|
|                                                                                                                                  |                                             |                                                               |                                                                                                                                                                                                                                                     |                                                                                                                                                                                                                                                                               | outcomes assessing perceived health.                                                                                                                                                                                    |
| Knowles J. et al., 1988: <i>Dietary supplementation and respiratory muscle performance in patients with COPD</i> <sup>30</sup> . | Randomized observer-blinded crossover trial | 25 participants with stable severe COPD at outpatient setting | <p><i>I</i> (n=25): Powdered supplement containing 24% protein, 22% fat and 54 % carbohydrates (Sustacal®). Increasing caloric intake by 50% daily.</p> <p><i>C</i> (n=25): no placebo</p> <p><i>Duration</i>: 8 weeks for each crossover phase</p> | <p><b>Lung function: FEV1</b> (% predicted, mean±SD)</p>                                                                                                                                                                                                                      | <p><u>Group A</u><br/> <i>Baseline</i>: 37±12<br/> <i>Intervention</i>: 36±14<br/> <i>Control</i>: 40±12<br/> <u>Group B</u><br/> <i>Baseline</i>: 40±14<br/> <i>Intervention</i>: 39±17<br/> <i>Control</i>: 36±11</p> |
|                                                                                                                                  |                                             |                                                               |                                                                                                                                                                                                                                                     | <p><b>Lung function: FVC</b> (% predicted, mean±SD)</p>                                                                                                                                                                                                                       | <p><u>Group A</u><br/> <i>Baseline</i>: 73±21<br/> <i>Intervention</i>: 67±18<br/> <i>Control</i>: 76±23<br/> <u>Group B</u><br/> <i>Baseline</i>: 65±16<br/> <i>Intervention</i>: 68±17<br/> <i>Control</i>: 66±17</p> |
|                                                                                                                                  |                                             |                                                               |                                                                                                                                                                                                                                                     | <p><b>Inflammatory marker:</b> serum lymphocytes (count/μL)</p>                                                                                                                                                                                                               | <p><u>Group A</u><br/> <i>Baseline</i>: 1516±645<br/> <i>After-intervention</i>: 1720±635<br/> <u>Group B</u><br/> <i>Baseline</i>: 1789±746<br/> <i>After-intervention</i>: 1681±710</p>                               |
|                                                                                                                                  |                                             |                                                               |                                                                                                                                                                                                                                                     | <p><b>Respiratory muscle performance:</b> Maximal static inspiratory pressure at the mouth (PI<sub>max</sub>), maximal expiratory pressure at the mouth after maximal inspiration (PE<sub>max</sub>), sustainable inspiratory pressure (SIP), pressure time product (PTP)</p> | No significant differences on any outcomes.                                                                                                                                                                             |
|                                                                                                                                  |                                             |                                                               |                                                                                                                                                                                                                                                     | <p><b>SUMMARY</b></p>                                                                                                                                                                                                                                                         | No significant differences on outcome measures including lung function parameters, respiratory                                                                                                                          |

Supplementary material for *Effects of nutritional interventions in individuals with chronic obstructive lung disease: A systematic review of randomized controlled trials*

|                                                                                                                                                                                          |                                            |                                                      |                                                                                                                                                                                   |                                                                                                            |                                                                                                                                                                                |
|------------------------------------------------------------------------------------------------------------------------------------------------------------------------------------------|--------------------------------------------|------------------------------------------------------|-----------------------------------------------------------------------------------------------------------------------------------------------------------------------------------|------------------------------------------------------------------------------------------------------------|--------------------------------------------------------------------------------------------------------------------------------------------------------------------------------|
|                                                                                                                                                                                          |                                            |                                                      |                                                                                                                                                                                   |                                                                                                            | muscle function and lymphocyte count.                                                                                                                                          |
| Muhamad R. et al., 2018: <i>The effect of Tualang honey on the quality of life of patients with chronic obstructive pulmonary disease: a randomized controlled trial</i> <sup>26</sup> . | Single-blinded randomized controlled trial | 60 male participants with COPD at outpatient setting | I (30/22): 1/day sacket with 20 mg Tualang honey. Advised to consume before breakfast.<br><br>C (n=30/12): no placebo<br><br>Duration: 6 months. Assessment at 2, 4 and 6 months. | <b>Perceived health:</b> SGRQ total score, mean change from baseline (95% CI)                              | I: 48 (40, 55) – 23 (15, 31)<br>C: 48 (38, 58) – 42 (31, 53)<br>Difference between groups: p=0.001                                                                             |
|                                                                                                                                                                                          |                                            |                                                      |                                                                                                                                                                                   | <b>Perceived health:</b> SGRQ symptom domain score, mean change from baseline (95% CI)                     | I: 47 (37, 56) – 22 (13, 31)<br>C: 49 (36, 63) – 34 (22, 47)<br><br>Difference between groups p=0.677                                                                          |
|                                                                                                                                                                                          |                                            |                                                      |                                                                                                                                                                                   | <b>Perceived health:</b> SGRQ activity domain score, mean change from baseline (95% CI)                    | I: 68 (58, 78) – 34 (24, 44)<br>C: 67 (53, 81) – 62 (49, 76)<br><br>Difference between groups p=0.001                                                                          |
|                                                                                                                                                                                          |                                            |                                                      |                                                                                                                                                                                   | <b>Perceived health:</b> SGRQ impact domain score, mean change from baseline (95% CI)                      | I:37 (30, 45) – 17 (9.0, 25)<br>C:37 (27, 46) – 33 (22, 43)<br><br>Difference between groups p=0.001                                                                           |
|                                                                                                                                                                                          |                                            |                                                      |                                                                                                                                                                                   | FEV1(l), pre-post median                                                                                   | I: 1.23– 1.25, p=0.013<br>C: 1.25–0.96, p=0.009                                                                                                                                |
|                                                                                                                                                                                          |                                            |                                                      |                                                                                                                                                                                   | FVC(l), pre-post median                                                                                    | I: 2.26-2.23, p=0.031<br>C: 2.17-2.27, p<0.001                                                                                                                                 |
|                                                                                                                                                                                          |                                            |                                                      |                                                                                                                                                                                   | FEV1/FVC (%), pre-post median                                                                              | I: 59.2-59.0, p=0.199<br>C: 57.2-51.0, p=0.362                                                                                                                                 |
|                                                                                                                                                                                          |                                            |                                                      |                                                                                                                                                                                   | FEF <sub>25-75</sub> (%), pre-post median                                                                  | I: 0.70-0.58, p=0.215<br>C: 0.54-0.45, p=0.179                                                                                                                                 |
|                                                                                                                                                                                          |                                            |                                                      |                                                                                                                                                                                   | <b>SUMMARY</b>                                                                                             | Improved perceived health (SGRQ) for I compared to C on total score and on all subdomains except for symptom domain. Non-significant between-group changes in lung parameters. |
|                                                                                                                                                                                          |                                            |                                                      |                                                                                                                                                                                   | Panahi Y. et al., 2012: <i>Impact of Adjunctive Therapy with Chlorellav ulgaris Extract on Antioxidant</i> | Randomized open-label clinical trial                                                                                                                                           |

Supplementary material for *Effects of nutritional interventions in individuals with chronic obstructive lung disease: A systematic review of randomized controlled trials*

|                                                                                                                         |                                                                 |                                                |                                                                              |                                                                        |                                                   |
|-------------------------------------------------------------------------------------------------------------------------|-----------------------------------------------------------------|------------------------------------------------|------------------------------------------------------------------------------|------------------------------------------------------------------------|---------------------------------------------------|
| <p><i>Status, Pulmonary Function, and Clinical Symptoms of Patients with Obstructive Pulmonary Diseases</i><br/>27.</p> |                                                                 |                                                | form of tablets                                                              |                                                                        | a significant improvement from baseline (p=0.03). |
|                                                                                                                         |                                                                 |                                                | <i>C</i> (n=49/29): no placebo.                                              |                                                                        |                                                   |
|                                                                                                                         |                                                                 |                                                | <i>Duration</i> : 8 weeks.                                                   |                                                                        |                                                   |
|                                                                                                                         |                                                                 |                                                | <b>Antioxidant status:</b><br>Vitamin E, magnitude of change ± SD            | I: 2.78±15.9<br>C: 0.05±0.25<br>Difference between groups:<br>p<0.001  |                                                   |
|                                                                                                                         |                                                                 |                                                | <b>Antioxidant status:</b><br>Vitamin C, magnitude of change±SD              | I: 0.46±0.34<br>C: -0.04±0.20<br>Difference between groups:<br>p<0.001 |                                                   |
|                                                                                                                         |                                                                 |                                                | <b>Antioxidant status:</b><br>Glutathione, magnitude of change±SD            | I: 9.4±2.3<br>C: 2.6±5.2<br>Difference between groups:<br>p<0.001      |                                                   |
|                                                                                                                         |                                                                 |                                                | <b>Antioxidant status:</b><br>Malonedialdehyde, magnitude of change±SD       | I: -2.0±0.86<br>C: -0.60±1.5<br>Difference between groups:<br>p=0.025  |                                                   |
|                                                                                                                         |                                                                 |                                                | <b>Antioxidant status:</b><br>Glutathione peroxidase, magnitude of change±SD | I: 2.3±0.44<br>C: 0.15±1.1<br>Difference between groups:<br>p<0.001    |                                                   |
|                                                                                                                         |                                                                 |                                                | <b>Antioxidant status:</b><br>Catalase, magnitude of change±SD               | I: 10.5±5.0<br>C: -1.7±5.3<br>Difference between groups:<br>p<0.001    |                                                   |
|                                                                                                                         |                                                                 |                                                | <b>Antioxidant status:</b><br>Superoxide dismutase, magnitude of change±SD   | I: 1.0±0.56<br>C: 0.60±0.78<br>Difference between groups:<br>p=0.011   |                                                   |
| <b>Antioxidant status:</b><br>Total antioxidant status, magnitude of change±SD                                          | I: 0.30±0.24<br>C: 0.20±0.29<br>Difference between groups: p=ns |                                                |                                                                              |                                                                        |                                                   |
| <b>Perceived health:</b><br>SGRQ symptom domain                                                                         |                                                                 | <b>SGRQ symptoms domain</b><br><u>Coughing</u> |                                                                              |                                                                        |                                                   |

Supplementary material for *Effects of nutritional interventions in individuals with chronic obstructive lung disease: A systematic review of randomized controlled trials*

|                                                                                                                                                                                                                      |                                                      |                                                      |                                                                                                                                                                                                                                                            |                                                                                                  |                                                                                                                                                                                                                                                                                                                                                                                                    |
|----------------------------------------------------------------------------------------------------------------------------------------------------------------------------------------------------------------------|------------------------------------------------------|------------------------------------------------------|------------------------------------------------------------------------------------------------------------------------------------------------------------------------------------------------------------------------------------------------------------|--------------------------------------------------------------------------------------------------|----------------------------------------------------------------------------------------------------------------------------------------------------------------------------------------------------------------------------------------------------------------------------------------------------------------------------------------------------------------------------------------------------|
|                                                                                                                                                                                                                      |                                                      |                                                      |                                                                                                                                                                                                                                                            |                                                                                                  | <p>Reduced for both groups, non-significant differences between I and C</p> <p><u>Shortness of breath</u><br/>Reduced for both groups, non-significant differences between I and C</p> <p><u>Wheezing</u><br/>Reduced for both groups, non-significant differences between I and C</p> <p><u>Sputum production</u><br/>Both groups improved, significantly greater improvement for I (p=0.02).</p> |
|                                                                                                                                                                                                                      |                                                      |                                                      |                                                                                                                                                                                                                                                            | <b>SUMMARY</b>                                                                                   | Improved antioxidant status for all measures (except TAS) for I compared to C. No significant differences on lung function parameters. No significant findings on symptom domain, except for the item on sputum production where I had a slight improvement compared to C.                                                                                                                         |
| Pavitt M. J. et al., 2020: <i>Oral nitrate supplementation to enhance pulmonary rehabilitation in COPD: ON-EPIC a multicentre, double-blind, placebo-controlled, randomised parallel group study</i> <sup>22</sup> . | Randomized, placebo controlled, double blinded trial | 165 participants with stable moderate to severe COPD | <p>I (78/57): 140 ml of a beetroot juice product containing 0.8 g of nitrate consumed 3 h before PR sessions</p> <p>C (87/65): 140 ml nitrate depleted beetroot juice</p> <p>Both: PR program consisting of 2x/week supervised exercise and home based</p> | <b>Physical function:</b><br>Incremental shuttle walk test (estimated treatment effect (95% CI)) | 30 m (10, 40), p = 0.027                                                                                                                                                                                                                                                                                                                                                                           |
|                                                                                                                                                                                                                      |                                                      |                                                      |                                                                                                                                                                                                                                                            | <b>Perceived health:</b><br>COPD assessment test (estimated treatment effect (95% CI))           | 0 (-1,3), p=0.74                                                                                                                                                                                                                                                                                                                                                                                   |
|                                                                                                                                                                                                                      |                                                      |                                                      |                                                                                                                                                                                                                                                            | <b>Dyspnea:</b> MRC dyspnea score (estimated treatment effect (95% CI))                          | 0 (0,0), p=0.90                                                                                                                                                                                                                                                                                                                                                                                    |

Supplementary material for *Effects of nutritional interventions in individuals with chronic obstructive lung disease: A systematic review of randomized controlled trials*

|                                                                                                                                                                            |                                              |                                                        |                                                                                                                                               |                                                                                                                                                            |                                                                                                                                                                                                                              |
|----------------------------------------------------------------------------------------------------------------------------------------------------------------------------|----------------------------------------------|--------------------------------------------------------|-----------------------------------------------------------------------------------------------------------------------------------------------|------------------------------------------------------------------------------------------------------------------------------------------------------------|------------------------------------------------------------------------------------------------------------------------------------------------------------------------------------------------------------------------------|
|                                                                                                                                                                            |                                              |                                                        | <p>exercises</p> <p>Duration: 8 weeks</p>                                                                                                     | <p><b>Physical function:</b><br/>Daily step count (estimated treatment effect (95% CI))</p> <p>*Sample reduced to I: 28, C: 37</p>                         | 784 steps/day (100, 1471), p=0.02                                                                                                                                                                                            |
|                                                                                                                                                                            |                                              |                                                        |                                                                                                                                               | <p><b>Physical function:</b><br/>physical activity level (estimated treatment effect (95% CI))</p> <p>*Sample reduced to I: 28, C: 37</p>                  | 0.2 (-0.3, 0.7), p=0.73                                                                                                                                                                                                      |
|                                                                                                                                                                            |                                              |                                                        |                                                                                                                                               | <p><b>Physical function:</b><br/>time spent in activity &gt;3 METs (estimated treatment effect (95% CI))</p> <p>*Sample reduced to I: 28, C: 37</p>        | 13 min/day (2, 28), p=0.02                                                                                                                                                                                                   |
|                                                                                                                                                                            |                                              |                                                        |                                                                                                                                               | <p><b>SUMMARY</b></p>                                                                                                                                      | Significant treatment effect on physical function measures including ISWT, daily steps and time spent in activity >3 METs. No significant difference between groups on dyspnea, perceived health or physical activity level. |
| Steiner M. C. et al., 2003: <i>Nutritional enhancement of exercise performance in chronic obstructive pulmonary disease: a randomised controlled trial</i> <sup>31</sup> . | Randomized placebo-controlled clinical trial | 85 participants with stable COPD at outpatient setting | <p>I (42/25): 3/day 125 ml nutritional drink (Respifor®) providing a total of 570 kcal daily (60 % carbohydrates, 20 % protein, 20 % fat)</p> | <p><b>Physical function:</b><br/>Incremental shuttle walk test (m, mean difference between groups (95% CI))</p> <p>* for participants with BMI &gt; 19</p> | 18 (-8, 45), p=0.174                                                                                                                                                                                                         |
|                                                                                                                                                                            |                                              |                                                        | <p>C (43/35): Non-nutritive placebo</p>                                                                                                       | <p><b>Physical function:</b><br/>Excremental shuttle walk test (m, mean</p>                                                                                | *27 (1,53), p=0.041<br>103 (-55, 255), p=0.182                                                                                                                                                                               |

Supplementary material for *Effects of nutritional interventions in individuals with chronic obstructive lung disease: A systematic review of randomized controlled trials*

|                                                                                                                                                           |                                                    |                                                                            |                                                                                                                                                                                                                              |                                                                                                                                                                                                                                                                                                                                                                                                  |                                                                                                                                                                                                                                                                                                                                                                                                               |
|-----------------------------------------------------------------------------------------------------------------------------------------------------------|----------------------------------------------------|----------------------------------------------------------------------------|------------------------------------------------------------------------------------------------------------------------------------------------------------------------------------------------------------------------------|--------------------------------------------------------------------------------------------------------------------------------------------------------------------------------------------------------------------------------------------------------------------------------------------------------------------------------------------------------------------------------------------------|---------------------------------------------------------------------------------------------------------------------------------------------------------------------------------------------------------------------------------------------------------------------------------------------------------------------------------------------------------------------------------------------------------------|
|                                                                                                                                                           |                                                    |                                                                            | Both: 2/week pulmonary rehabilitation programme with endurance training as well as patient education<br><br>Duration: 7 weeks                                                                                                | difference between groups (95% CI)<br><br>* for participants with BMI > 19<br><br><b>Physical function:</b><br>Hand grip strength (kg force, mean difference between groups (95% CI))<br><br>* for participants with BMI > 19<br><br><b>Physical function:</b><br>Quadriceps strength (N, mean difference between groups (95% CI))<br><br>* for participants with BMI > 19<br><br><b>SUMMARY</b> | *121 (-44, 286), p=0.129<br><br>0.95 (-0.04, 1.89), p=0.060<br><br>*0.85 (-0.26, 1.97), p=0.129<br><br>16.5 (-1.2, 34.2), p=0.068<br><br>*16.5 (-3.1, 36.1), p=0.097<br><br>Non-significant differences between groups on outcome measures related to physical function. Sensitivity analysis of those with BMI > 19 revealed a small improvement on the ISWT for the intervention group compared to control. |
| Sugawara, K. et al, 2012: <i>Effect of anti-inflammatory supplementation with whey peptide and exercise therapy in patients with COPD</i> <sup>28</sup> . | Randomized, parallel, controlled, un-blinded trial | 36 patients with stable COPD and body weight < 110 % of ideal body weight. | I (n=18/17): 2/day 200 ml nutrition drink (MEIN™) containing 200 kcal, protein 20%, lipids 25%, sugars 53,2 % and food fibers 1,8%. Added whey peptide, n-3-fatty acids, vitamin A, C, and D.<br><br>C (n=18/14): no placebo | <b>Respiratory muscle:</b><br>Maximum expiratory mouth pressure (cmH <sub>2</sub> O, mean change ±SD)<br><br><b>Respiratory muscle:</b><br>Maximum inspiratory mouth pressure (cmH <sub>2</sub> O, mean change ±SD)<br><br><b>Physical function:</b><br>Weight bearing index; isometric extension and                                                                                            | I: 40.1±55.6, p=0.01<br>C: 8.8±36.0, p=ns<br><br>Difference between groups: ns<br><br>I: 39,2±38,9 (p=0.0011)<br>C: 0.1±24.1 (p=ns)<br><br>Difference between groups: p=0.003<br><br>I: 10.0±13.3 (p=0.0169)<br>C: -1.6±9.5 (p=ns)                                                                                                                                                                            |

Supplementary material for *Effects of nutritional interventions in individuals with chronic obstructive lung disease: A systematic review of randomized controlled trials*

|  |  |  |                                                                                                                                                       |                                                                                                                                |                                                                                                                                                                        |
|--|--|--|-------------------------------------------------------------------------------------------------------------------------------------------------------|--------------------------------------------------------------------------------------------------------------------------------|------------------------------------------------------------------------------------------------------------------------------------------------------------------------|
|  |  |  | <p><i>Both:</i> Pulmonary rehabilitation; dietary instructions, exercise, breathing training and COPD education.</p> <p><i>Duration:</i> 12 weeks</p> | <p>contraction of quadriceps muscle (kg/kg, mean change % <math>\pm</math>SD)</p>                                              | <p>Difference between groups: <math>p=0.0079</math></p>                                                                                                                |
|  |  |  |                                                                                                                                                       | <p><b>Physical function:</b> 6 minute walk test (m, mean change % <math>\pm</math>SD)</p>                                      | <p>I: 19.7<math>\pm</math>24.7 (<math>p=0.004</math>)<br/>C: -7.1<math>\pm</math>50.8 (<math>p=ns</math>)<br/>Difference between groups: <math>p=0.0137</math></p>     |
|  |  |  |                                                                                                                                                       | <p><b>Perceived health:</b> Chronic respiratory disease questionnaire, total (CRQ score, mean change % <math>\pm</math>SD)</p> | <p>I: 6.2<math>\pm</math>7.5 (<math>p=0.0033</math>)<br/>C: -2.7<math>\pm</math>13.1 (<math>p=ns</math>)<br/><br/>Difference between groups: <math>p=0.0374</math></p> |
|  |  |  |                                                                                                                                                       | <p><b>Perceived health:</b> CRQ, dyspnea subscale (score, mean change % <math>\pm</math>SD)</p>                                | <p>I: 10.8<math>\pm</math>26.8 (<math>p=ns</math>)<br/>C: -2.7<math>\pm</math>21.3 (<math>p=ns</math>)<br/>Difference between groups: ns</p>                           |
|  |  |  |                                                                                                                                                       | <p><b>Perceived health:</b> CRQ, fatigue subscale (score, mean <math>\pm</math>SD)</p>                                         | <p>I: 8.3<math>\pm</math>17.9 (<math>p=ns</math>)<br/>C: -3.6<math>\pm</math>22.8 (<math>p=ns</math>)<br/>Difference between groups: ns</p>                            |
|  |  |  |                                                                                                                                                       | <p><b>Perceived health:</b> CRQ, emotional subscale (score, mean <math>\pm</math>SD)</p>                                       | <p>Change: 8.9<math>\pm</math>14.4 (<math>p=ns</math>)<br/>C: -3.9<math>\pm</math>12.2 (<math>p=ns</math>)<br/>Difference between groups: <math>p=0.0097</math></p>    |
|  |  |  |                                                                                                                                                       | <p><b>Perceived health:</b> CRQ, mastery subscale (score, mean change % <math>\pm</math>SD)</p>                                | <p>I: 3.1<math>\pm</math>9.1 (<math>p=ns</math>)<br/>C: 3.6<math>\pm</math>20.8 (<math>p=ns</math>)<br/>Difference between groups: ns</p>                              |
|  |  |  |                                                                                                                                                       | <p><b>Dyspnea:</b> MRC during 6MWT (score, mean change <math>\pm</math>SD)</p>                                                 | <p>I: -4,4<math>\pm</math>17,2 (<math>p=ns</math>)<br/>C: 22,6<math>\pm</math>40,6 (<math>p=ns-9</math>)<br/>Difference between groups: <math>p=0,0339</math></p>      |
|  |  |  |                                                                                                                                                       | <p><b>Inflammatory marker:</b> Interleukin 6 (pg/ml, mean change % <math>\pm</math>SD)</p>                                     | <p>I: -10.6<math>\pm</math>33.7 (<math>p=ns</math>)<br/>C: 16.5<math>\pm</math>29.4 (<math>p=ns</math>)<br/>Difference between groups: <math>p=0.0268</math></p>       |
|  |  |  |                                                                                                                                                       | <p><b>Inflammatory marker:</b></p>                                                                                             | <p>I: -32.7<math>\pm</math>101.3 (<math>p=0.0332</math>)<br/>C: 1.52<math>\pm</math>2.30 (<math>p=ns</math>)</p>                                                       |

Supplementary material for *Effects of nutritional interventions in individuals with chronic obstructive lung disease: A systematic review of randomized controlled trials*

|  |  |  |  |                                                                                                   |                                                                                                                                                                                                                                                                                                                            |
|--|--|--|--|---------------------------------------------------------------------------------------------------|----------------------------------------------------------------------------------------------------------------------------------------------------------------------------------------------------------------------------------------------------------------------------------------------------------------------------|
|  |  |  |  | Interleukin 8 (pg/ml, mean change % $\pm$ SD)                                                     | Difference between groups:<br>p=0.0021                                                                                                                                                                                                                                                                                     |
|  |  |  |  | <b>Inflammatory marker:</b><br>High-sensitivity C-reactive protein (mg/l, mean change % $\pm$ SD) | I: -22.6 $\pm$ 41.8 (p=0.0357)<br>C: 28.8 $\pm$ 100.9 (p=ns)<br><br>Difference between groups:<br>p=0.0470                                                                                                                                                                                                                 |
|  |  |  |  | <b>Inflammatory marker:</b><br>Tumor necrosis factor- $\alpha$ (pg/ml, change % $\pm$ SD)         | I: -12.9 $\pm$ 15.3 (p=0.0053)<br>C: 4.4 $\pm$ 20.5 (p=ns)<br>Difference between groups:<br>p=0.0112                                                                                                                                                                                                                       |
|  |  |  |  | <b>SUMMARY</b>                                                                                    | Significant difference between groups in MIP, weight bearing index, 6MWT, CRQ (total and emotional subscale) and MRC during 6MWT. Significant reduction in inflammatory markers IL-6, IL-8, hsCRP and TNF- $\alpha$ for I compared to C. No significant difference in MEP or CRQ (dyspnea, fatigue and mastery subscales). |

6MWT, six-minutes walking test; Borg RPE, Borg rating of perceived exertion; BMI, body mass index; CRP, C-reactive protein; DLCO, diffusing capacity in the lung for carbon monoxide; FEV1, forced expiratory volume in first second; FVC, forced vital capacity; FEF, forced expiratory flow; hsCRP, high sensitivity CRP; IL-6, interleukin 6; IL-8, interleukin 8; ISWT, incremental shuttle walk test; MEP, maximal expiratory pressure; MET, metabolic equivalent of task; MIP, maximal inspiratory pressure; MRC, medical research council; PEF, peak expiratory flow; SD, standard deviation; SGQR, St. Georges respiratory questionnaire
